# Supplementary material for: Alcohol Consumption Is a Risk Factor for Lower Extremity Arterial Disease in Chinese Patients with T2DM
Source: Hindawi journal article supplement (doi:10.1155/2017/8756978), 2017-01-01
Supplement: f1 [file 8756978.f1.pdf]

**Table S1 OR (95% CI) of LEAD in participants according to alcohol use (n=185)**

|                      |                              | N (%)     | Model D<br>OR (95% CI)   |
|----------------------|------------------------------|-----------|--------------------------|
| Alcohol use          |                              |           |                          |
|                      | None (reference)             | 8 (9.2)   | 1                        |
|                      | Yes                          | 19 (19.4) | <b>3.14 (1.07-9.17)</b>  |
|                      | P                            |           | 0.037                    |
| Alcohol consumption  |                              |           |                          |
|                      | None (reference)             | 8 (9.2)   | 1                        |
|                      | ≤8U/day                      | 12 (16.7) | 2.22 (0.69-7.17)         |
|                      | >8U/day                      | 7 (26.9)  | <b>7.15 (1.70-30.10)</b> |
|                      | P for trend                  |           | 0.009                    |
| Alcohol use duration |                              |           |                          |
|                      | None (reference)             | 8 (9.2)   | 1                        |
|                      | ≤20years                     | 7 (15.6)  | 3.73 (0.96-14.53)        |
|                      | >20years                     | 12 (22.6) | 2.83 (0.86-9.27)         |
|                      | P for trend                  |           | 0.074                    |
| Continuous           |                              |           |                          |
|                      | None (reference)             |           | 1                        |
|                      | Alcohol consumption (U)      |           | <b>1.12 (1.03-1.20)</b>  |
|                      | P                            |           | 0.005                    |
|                      | None (reference)             |           | 1                        |
|                      | Alcohol use duration (years) |           | 1.02 (0.99-1.05)         |
|                      | P                            |           | 0.191                    |

Model D: Adjusted for age, gender, region, occupation, smoking status, BMI, WC, T2DM duration, systolic blood pressure, cholesterol and prevalent cardiovascular disease.

**Table S2 OR (95% CI) of LEAD in male participants according to alcohol use (n=182)**

|                      |                              | N (%)     | Model D<br>OR (95% CI)   |
|----------------------|------------------------------|-----------|--------------------------|
| Alcohol use          |                              |           |                          |
|                      | None (reference)             | 7 (8.1)   | 1                        |
|                      | Yes                          | 19 (19.8) | <b>3.52 (1.17-10.60)</b> |
|                      | P                            |           | 0.025                    |
| Alcohol consumption  |                              |           |                          |
|                      | None (reference)             | 7 (8.1)   | 1                        |
|                      | ≤8U/day                      | 12 (17.1) | 2.52 (0.76-8.37)         |
|                      | >8U/day                      | 7 (26.9)  | <b>7.77 (1.80-33.54)</b> |
|                      | P for trend                  |           | 0.006                    |
| Alcohol use duration |                              |           |                          |
|                      | None (reference)             | 7 (8.1)   | 1                        |
|                      | ≤20years                     | 7 (15.6)  | <b>3.92 (1.00-15.35)</b> |
|                      | >20years                     | 12 (23.5) | 3.30 (0.98-11.12)        |
|                      | P for trend                  |           | 0.047                    |
| Continuous           |                              |           |                          |
|                      | None (reference)             |           | 1                        |
|                      | Alcohol consumption (U)      |           | <b>1.12 (1.03-1.20)</b>  |
|                      | P                            |           | 0.004                    |
|                      | None (reference)             |           | 1                        |
|                      | Alcohol use duration (years) |           | 1.03 (1.00-1.06)         |
|                      | P                            |           | 0.089                    |

Model D: Adjusted for age, region, occupation, smoking status, BMI, WC, T2DM duration, systolic blood pressure, cholesterol and prevalent cardiovascular disease.
